# Supplementary material
Source: PubMed Central journal article supplement (PMC9267037)
Supplement: NIHMS1819876-supplement-Multimedia_Component_1.pdf [file NIHMS1819876-supplement-Multimedia_Component_1.pdf]

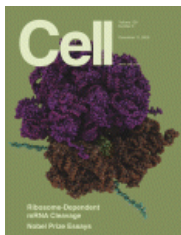

## Matrix Elasticity Directs Stem Cell Lineage Specification

**Author:** Adam J. Engler, Shamik Sen, H. Lee Sweeney, Dennis E. Discher

**Publication:** Cell

**Publisher:** Elsevier

**Date:** 25 August 2006

Copyright © 2006 Elsevier Inc. All rights reserved.

### Order Completed

Thank you for your order.

This Agreement between Stanford University -- Ruth Tevlin ("You") and Elsevier ("Elsevier") consists of your license details and the terms and conditions provided by Elsevier and Copyright Clearance Center.

Your confirmation email will contain your order number for future reference.

License Number 5095061415272

[Printable Details](#)

License date Jun 23, 2021

#### ✓ Licensed Content

|                              |                                                               |
|------------------------------|---------------------------------------------------------------|
| Licensed Content Publisher   | Elsevier                                                      |
| Licensed Content Publication | Cell                                                          |
| Licensed Content Title       | Matrix Elasticity Directs Stem Cell Lineage Specification     |
| Licensed Content Author      | Adam J. Engler, Shamik Sen, H. Lee Sweeney, Dennis E. Discher |
| Licensed Content Date        | Aug 25, 2006                                                  |
| Licensed Content Volume      | 126                                                           |
| Licensed Content Issue       | 4                                                             |
| Licensed Content Pages       | 13                                                            |

#### 📄 Order Details

|                                              |                                |
|----------------------------------------------|--------------------------------|
| Type of Use                                  | reuse in a journal/magazine    |
| Requestor type                               | academic/educational institute |
| Portion                                      | figures/tables/illustrations   |
| Number of figures/tables/illustrations       | 1                              |
| Format                                       | both print and electronic      |
| Are you the author of this Elsevier article? | Yes                            |
| Will you be translating?                     | No                             |

### About Your Work

**Title of new article** Musculoskeletal Tissue Engineering: Adipose Derived Stromal Cell Implementation for the Treatment of Osteoarthritis

**Lead author** Ruth Tevlin

**Title of targeted journal** Biomaterials

**Publisher** Elsevier

**Expected publication date** Oct 2021

### Requestor Location

**Requestor Location** Stanford University  
Hagey Laboratory  
257 Campus Drive  
Stanford  
Stanford, CA 94305  
United States  
Attn: Ruth Tevlin

### Price

**Total** 0.00 USD

### Additional Data

**Portions** Figure 1

### Tax Details

**Publisher Tax ID** 98-0397604

**Total: 0.00 USD**

[CLOSE WINDOW](#)

[ORDER MORE](#)
