# Supplementary material
Source: PubMed Central journal article supplement (PMC9267037)
Supplement: NIHMS1819876-supplement-Multimedia_Component_2.pdf [file NIHMS1819876-supplement-Multimedia_Component_2.pdf]

Search for help on Frontiers

Search

[Frontiers Help Center \(/hc/en-us\)](#) > [Article Production \(/hc/en-us/categories/200397292-Article-Production-\)](#) > [Post - Publication \(/hc/en-us/sections/200736631-Post-Publication-\)](#)

Follow [\(/hc/en-us/articles/201945842-Do-I-need-permission-to-reproduce-figures-or-text-previously-published-in-Frontiers-/subscription.html\)](#)

## Do I need permission to reproduce figures or text previously published in Frontiers?

Updated : February 13, 2020 03:13

In most cases, adaptation and reuse of figures is permitted provided that the authors and original source are appropriately credited and that no third-party licenses apply (please see the citation on the article on-line page).

Frontiers does not provide any formal permissions for reuse.

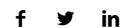

### Related articles

- [Do I need permission to reprint my article or parts of my article published with Frontiers? \(/hc/en-us/related/click?data=BAh7CjobZGVzdGluYXRpb25-53cce6f8aba508973d9879ad9e9ct](#)
- [What is the Frontiers Copyright Policy? \(/hc/en-us/related/click?data=BAh7CjobZGVzdGluYXRpb25-33ae7e184309e682a0ff1f21ce2cdt](#)
- [How to reproduce a figure or other already published material? \(/hc/en-us/related/click?data=BAh7CjobZGVzdGluYXRpb25-65a85bfeef98de3d077d07b3a61d7](#)
- [Do I need to obtain copyright licenses for reuse of already published third party material? \(/hc/en-us/related/click?data=BAh7CjobZGVzdGluYXRpb25-f6f635f17c1494c0df9a33c5211b348](#)
- [How should I format my figures? \(/hc/en-us/related/click?data=BAh7CjobZGVzdGluYXRpb25-9e59196d94d6bbfe06584ce8ff559t](#)
